# Supplementary material for: Effect of climate warming on the annual terrestrial net ecosystem CO2 exchange globally in the boreal and temperate regions
Source: PubMed Central journal article supplement (PMC5465071; doi:10.1038/s41598-017-03386-5), 2017-06-08
Supplement: 41598_2017_3386_MOESM1_ESM.pdf [file 41598_2017_3386_MOESM1_ESM.pdf]

1                   **Supplementary Information (SI) Appendix for**  
2                   **Effect of climate warming on the annual terrestrial net ecosystem**  
3                   **CO<sub>2</sub> exchange globally in the boreal and temperate regions**

4  
5                   Zhiyuan Zhang<sup>1</sup>, Renduo Zhang<sup>1,\*</sup>, Alessandro Cescatti<sup>2</sup>, Georg Wohlfahrt<sup>3</sup>, Nina  
6                   Buchmann<sup>4</sup>, Juan Zhu<sup>1</sup>, Guanhong Chen<sup>1</sup>, Fernando Moyano<sup>5</sup>, Jukka Pumpanen<sup>6</sup>,  
7                   Takashi Hirano<sup>7</sup>, Kentaro Takagi<sup>8</sup> & Lutz Merbold<sup>4</sup>

8  
9                   <sup>1</sup>*School of Environmental Science and Engineering, Guangdong Provincial Key*  
10                  *Laboratory of Environmental Pollution Control and Remediation Technology, Sun*  
11                  *Yat-sen University, Guangzhou 510275, China*

12                  <sup>2</sup>*Institute for Environment and Sustainability, Climate Risk Management Unit,*  
13                  *European Commission, Joint Research Centre, Ispra I-21027, Italy*

14                  <sup>3</sup>*Institute of Ecology, University of Innsbruck, Sternwartestr 15, Innsbruck 6020,*  
15                  *Austria*

16                  <sup>4</sup>*Institute of Agricultural Sciences, ETH Zürich, Universitaetsstrasse 2, Zürich 8092,*  
17                  *Switzerland*

18                  <sup>5</sup>*Department of Bioclimatology, Georg-August University of Göttingen, Büsingenweg 2,*  
19                  *Göttingen 37077, Germany*

20                  <sup>6</sup>*Department of Environmental and Biological Sciences, University of Eastern*  
21                  *Finland, Kuopio 70211, Finland*

22                  <sup>7</sup>*Research Faculty of Agriculture, Hokkaido University, Sapporo 060-8589, Japan*

23                  <sup>8</sup>*Northern Forestry and Development Office, Field Science Center for Northern*

24 *Biosphere, Hokkaido University, Horonobe 098-2943, Japan*

25

26 \* Corresponding author: Tel.: +86 20 84110052; fax: +86 20 84110692;

27 E-mail: [zhangrd@mail.sysu.edu.cn](mailto:zhangrd@mail.sysu.edu.cn)

## 28 **Materials and Methods**

### 29 *Data*

30 Data sources of GPP and RE were assembled from the FLUXNET Database  
31 (<http://www.fluxdata.org/>, Open Data set), European Flux Database (European Fluxes  
32 Database Cluster <http://gaia.agraria.unitus.it/>), AmeriFlux (<http://ameriflux.lbl.gov/>),  
33 Distributed Active Archive Center for Biogeochemical Dynamics (ORNL DAAC  
34 <http://daac.ornl.gov/>). In total, 403 site-years at 101 sites were collected. The  
35 datasets covered various ecosystems between 40 °N to 71 °N, except 3 datasets from  
36 Russia, all data were primarily in Europe and North America and during the time  
37 period from 1991 to 2006 (Fig. S1). Our database included two main climate group,  
38 93 of which were from the boreal zone (between 49 and 71 °N), and 310 of which  
39 were from temperate zone (between 40 and 64 °N). The collected data were  
40 classified by plant functional types (PFTs) according to the International  
41 Geosphere-Biosphere Programme (IGBP, 2012, <http://www.igbp.net>). In this study,  
42 data were divided into two major parts, 260 of which were from forest sites including  
43 deciduous broadleaf forest (DBF,  $n=65$ ), evergreen needleleaf forest (ENF,  $n=165$ )  
44 and mixed forest (MF,  $n=30$ ), 143 of which were from non-forest sites including  
45 croplands (CRO,  $n=40$ ), closed shrublands (CSH,  $n=5$ ), grasslands (GRA,  $n=61$ ),  
46 open shrublands (OSH,  $n=13$ ) and permanent wetland (WET,  $n=24$ ). Basic  
47 information of the database, including site ID, latitude, longitude, PFT, climate group,  
48 year of data collection, and reference of each data set, is listed Table S1.

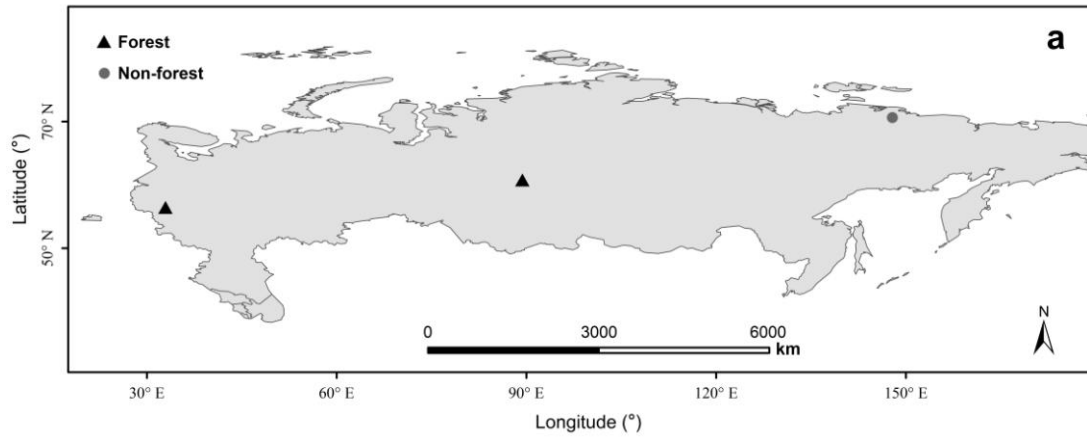

49

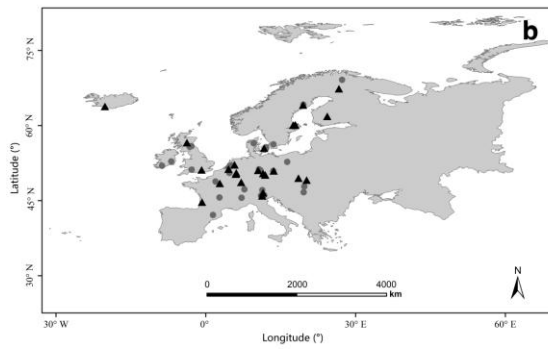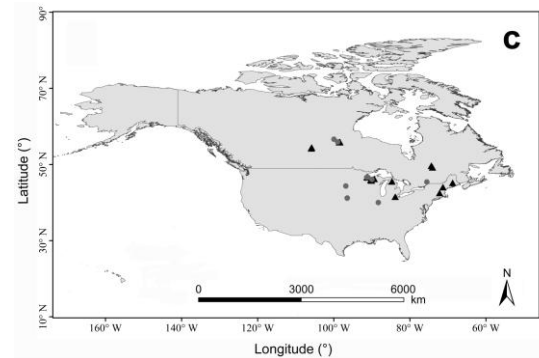

50 **Fig. S1 Distribution of geographic locations of the collected sites in (a) Russia, (b)**  
 51 **Europe, and (c) North American.** Site information (i.e., latitude, longitude, and  
 52 plant functional types) was collected from <http://fluxnet.fluxdata.org/>. The maps  
 53 were created with ArcGIS 10.1 (ESRI Inc., USA,  
 54 <http://www.esri.com/arcgis/about-arcgis>).

55 **Table S1** Basic information (including site ID, latitude, longitude, plant functional type (PFT), climate group, year of data collection, and  
 56 reference) of the database used in this study. All the information gathered from <http://fluxnet.fluxdata.org/>.

| Site ID | Latitude <sup>1</sup> | Longitude <sup>2</sup> | PFT | Climate group                                        | Year                            | Reference |
|---------|-----------------------|------------------------|-----|------------------------------------------------------|---------------------------------|-----------|
| AT-Neu  | 47.12                 | 11.32                  | GRA | Temperate                                            | 2002-2004                       | 1         |
| BE-Bra  | 51.31                 | 4.52                   | MF  | Temperate                                            | 1997-1998, 2000-2002, 2004-2006 | 2         |
| BE-Jal  | 50.56                 | 6.07                   | MF  | Temperate                                            | 2006                            | ----      |
| BE-Lon  | 50.55                 | 4.74                   | CRO | Temperate                                            | 2004-2006                       | 3         |
| BE-Vie  | 50.31                 | 6.00                   | MF  | Temperate                                            | 1996-2006                       | 4         |
| CA-Man  | 55.88                 | -98.48                 | ENF | Boreal                                               | 1994-1995, 1997-2003            | 5         |
| CA-Mer  | 45.41                 | -75.52                 | WET | Temperate-Continental<br>with hot or warm<br>summers | 1999-2005                       | 6         |
| CA-NS1  | 55.88                 | -98.48                 | ENF | Boreal                                               | 2002-2005                       | 7         |
| CA-NS2  | 55.91                 | -98.52                 | ENF | Boreal                                               | 2001-2005                       | 7         |
| CA-NS3  | 55.91                 | -98.38                 | ENF | Boreal                                               | 2001-2005                       | 7         |

|        |       |         |     |                                                      |           |    |
|--------|-------|---------|-----|------------------------------------------------------|-----------|----|
| CA-NS4 | 55.91 | -98.38  | ENF | Boreal                                               | 2003-2004 | 7  |
| CA-NS5 | 55.86 | -98.49  | ENF | Boreal                                               | 2001-2005 | 7  |
| CA-NS6 | 55.92 | -98.96  | OSH | Boreal                                               | 2001-2005 | 7  |
| CA-NS7 | 56.64 | -99.95  | OSH | Boreal                                               | 2002-2005 | 6  |
| CA-Qcu | 49.27 | -74.04  | ENF | Boreal                                               | 2001-2006 | 8  |
| CA-Qfo | 49.69 | -74.34  | ENF | Boreal                                               | 2003-2006 | 9  |
| CA-SF1 | 54.49 | -105.82 | ENF | Boreal                                               | 2003-2005 | 10 |
| CA-SF2 | 54.25 | -105.88 | ENF | Boreal                                               | 2003-2005 | 10 |
| CH-Oe1 | 47.29 | 7.73    | GRA | Temperate                                            | 2002-2006 | 11 |
| CH-Oe2 | 47.29 | 7.73    | CRO | Temperate                                            | 2005      | 11 |
| CZ-BK1 | 49.50 | 18.54   | ENF | Temperate-Continental<br>with hot or warm<br>summers | 2000-2006 | 12 |
| DE-Bay | 50.14 | 11.87   | ENF | Temperate                                            | 1996-1999 | 13 |
| DE-Geb | 51.10 | 10.91   | CRO | Temperate                                            | 2004-2006 | 14 |

|        |       |       |     |           |           |      |
|--------|-------|-------|-----|-----------|-----------|------|
| DE-Gri | 50.95 | 13.51 | GRA | Temperate | 2005-2006 | 15   |
| DE-Hai | 51.08 | 10.45 | DBF | Temperate | 2000-2006 | 16   |
| DE-Kli | 50.89 | 13.52 | CRO | Temperate | 2004-2006 | 17   |
| DE-Meh | 51.27 | 10.65 | GRA | Temperate | 2003-2006 | 18   |
| DE-Tha | 50.96 | 13.57 | ENF | Temperate | 1996-2006 | 19   |
| DE-Wet | 50.45 | 11.46 | ENF | Temperate | 2002-2006 | 20   |
| DK-Fou | 56.48 | 9.59  | CRO | Temperate | 2005      | ---- |
| DK-Lva | 55.68 | 12.08 | GRA | Temperate | 2005-2006 | 15   |
| DK-Ris | 55.53 | 12.10 | CRO | Temperate | 2004-2005 | 17   |
| DK-Sor | 55.49 | 11.65 | DBF | Temperate | 1996-2006 | 21   |
| ES-VDA | 42.15 | 1.45  | GRA | Temperate | 2004-2006 | 22   |
| FI-Hyy | 61.85 | 24.29 | ENF | Boreal    | 1996-2006 | 23   |
| FI-Kaa | 69.14 | 27.30 | WET | Boreal    | 2000-2006 | ---- |

|        |       |        |     |           |                          |      |
|--------|-------|--------|-----|-----------|--------------------------|------|
| FI-Sod | 67.36 | 26.64  | ENF | Boreal    | 2000-2006                | 23   |
| FR-Fon | 48.48 | 2.78   | DBF | Temperate | 2005-2006                | 22   |
| FR-Gri | 48.84 | 1.95   | CRO | Temperate | 2005-2006                | 22   |
| FR-Hes | 48.67 | 7.06   | DBF | Temperate | 1997-2006                | 24   |
| FR-LBr | 44.72 | -0.77  | ENF | Temperate | 1996-1998,2000,2003-2005 | 25   |
| FR-Lq1 | 45.64 | 2.74   | GRA | Temperate | 2004-2006                | 15   |
| FR-Lq2 | 45.64 | 2.74   | GRA | Temperate | 2004-2006                | 15   |
| HU-Bug | 46.69 | 19.60  | GRA | Temperate | 2002-2006                | ---- |
| HU-Mat | 47.85 | 19.73  | GRA | Temperate | 2004-2006                | 26   |
| IE-Ca1 | 52.86 | -6.92  | CRO | Temperate | 2004-2006                | 15   |
| IE-Dri | 51.99 | -8.75  | GRA | Temperate | 2003-2005                | 27   |
| IS-Gun | 63.83 | -20.22 | DBF | Temperate | 1996-1998                | ---- |
| IT-Lav | 45.96 | 11.28  | ENF | Temperate | 2000-2002,2004,2006      | 28   |



|        |       |        |     |                                                      |           |      |
|--------|-------|--------|-----|------------------------------------------------------|-----------|------|
| IT-LMa | 45.58 | 7.15   | GRA | Temperate                                            | 2003-2006 | ---- |
| IT-Mal | 46.12 | 11.70  | GRA | Temperate                                            | 2003-2006 | 15   |
| IT-MBo | 46.02 | 11.05  | GRA | Temperate                                            | 2003-2006 | 29   |
| IT-Ren | 46.59 | 11.43  | ENF | Temperate                                            | 1999-2006 | 30   |
| NL-Ca1 | 51.97 | 4.93   | GRA | Temperate                                            | 2003-2006 | 15   |
| NL-Haa | 52.00 | 4.81   | GRA | Temperate                                            | 2003-2004 | ---- |
| NL-Hor | 52.03 | 5.07   | GRA | Temperate                                            | 2004-2006 | 31   |
| NL-Lan | 51.95 | 4.90   | CRO | Temperate                                            | 2005-2006 | ---- |
| NL-Loo | 52.17 | 5.74   | ENF | Temperate                                            | 1996-2006 | 32   |
| NL-Mol | 51.65 | 4.64   | CRO | Temperate                                            | 2005-2006 | ---- |
| PL-wet | 52.76 | 16.31  | WET | Temperate                                            | 2004-2005 | 33   |
| RU-Cok | 70.62 | 147.88 | OSH | Boreal                                               | 2003-2005 | ---- |
| RU-Fyo | 56.46 | 32.92  | ENF | Temperate-Continental<br>with hot or warm<br>summers | 1998-2004 | 34   |

|        |       |       |     |                                                      |                                 |      |
|--------|-------|-------|-----|------------------------------------------------------|---------------------------------|------|
| RU-Zot | 60.80 | 89.35 | ENF | Boreal                                               | 2002-2004                       | ---- |
| SE-Deg | 64.18 | 19.55 | WET | Boreal                                               | 2001-2005                       | 35   |
| SE-Faj | 56.27 | 13.55 | WET | Temperate                                            | 2005-2006                       | 36   |
| SE-Fla | 64.11 | 19.46 | ENF | Boreal                                               | 1996-1998,2001-2002             | 37   |
| SE-Nor | 60.09 | 17.48 | ENF | Temperate-Continental<br>with hot or warm<br>summers | 1996-1999,2003,2005             | 38   |
| SE-Sk1 | 60.13 | 17.92 | ENF | Temperate-Continental<br>with hot or warm<br>summers | 2005                            | ---- |
| SE-Sk2 | 60.13 | 17.84 | ENF | Temperate-Continental<br>with hot or warm<br>summers | 2004-2005                       | ---- |
| SK-Tat | 49.12 | 20.16 | ENF | Temperate-Continental<br>with hot or warm<br>summers | 2005                            | ---- |
| UK-AMo | 55.79 | -3.24 | WET | Temperate                                            | 2005                            | ---- |
| UK-EBu | 55.87 | -3.21 | GRA | Temperate                                            | 2004, 2006                      | 39   |
| UK-ESa | 55.91 | -2.86 | CRO | Temperate                                            | 2003-2005                       | 40   |
| UK-Gri | 56.61 | -3.80 | ENF | Temperate                                            | 1997-1998, 2000-2002, 2005-2006 | 41   |

|        |       |        |     |                                                      |                      |      |
|--------|-------|--------|-----|------------------------------------------------------|----------------------|------|
| UK-Ham | 51.15 | -0.86  | DBF | Temperate                                            | 2004-2005            | ---- |
| UK-PL3 | 51.45 | -1.27  | DBF | Temperate                                            | 2005-2006            | ---- |
| UK-Tad | 51.21 | -2.83  | GRA | Temperate                                            | 2001                 | ---- |
| US-Bar | 44.06 | -71.29 | DBF | Temperate-Continental<br>with hot or warm<br>summers | 2004-2005            | 42   |
| US-Bkg | 44.35 | -96.84 | GRA | Temperate-Continental<br>with hot or warm<br>summers | 2004-2006            | 43   |
| US-Bo1 | 40.01 | -88.29 | CRO | Temperate-Continental<br>with hot or warm<br>summers | 1996-2007            | 22   |
| US-Ha1 | 42.54 | -72.17 | DBF | Temperate-Continental<br>with hot or warm<br>summers | 1991-1998, 2004-2005 | 44   |
| US-Ho1 | 45.2  | -68.74 | ENF | Temperate-Continental<br>with hot or warm<br>summers | 1996-2004            | 45   |
| US-Ho2 | 45.21 | -68.75 | ENF | Temperate-Continental<br>with hot or warm<br>summers | 1999-2004            | 46   |
| US-Los | 46.08 | -89.98 | CSH | Temperate-Continental<br>with hot or warm<br>summers | 2001-2005            | 47   |
| US-Ne1 | 41.17 | -96.48 | CRO | Temperate-Continental<br>with hot or warm            | 2001-2005            | 48   |

|        |       |        |     |                                                      |                |      |
|--------|-------|--------|-----|------------------------------------------------------|----------------|------|
|        |       |        |     | summers                                              |                |      |
| US-Ne2 | 41.16 | -96.47 | CRO | Temperate-Continental<br>with hot or warm<br>summers | 2001-2005      | 48   |
| US-Ne3 | 41.18 | -96.44 | CRO | Temperate-Continental<br>with hot or warm<br>summers | 2001-2005      | 48   |
| US-Oho | 41.55 | -83.84 | DBF | Temperate-Continental<br>with hot or warm<br>summers | 2004-2005      | 49   |
| US-PFa | 45.95 | -90.27 | MF  | Temperate-Continental<br>with hot or warm<br>summers | 1996-2000,2003 | 50   |
| US-Syv | 46.24 | -89.35 | MF  | Temperate-Continental<br>with hot or warm<br>summers | 2002-2006      | 51   |
| US-UMB | 45.56 | -84.71 | DBF | Temperate-Continental<br>with hot or warm<br>summers | 1999-2003      | 52   |
| US-WCr | 45.81 | -90.08 | DBF | Temperate-Continental<br>with hot or warm<br>summers | 1999-2006      | 53   |
| US-Wi0 | 46.62 | -91.08 | ENF | Temperate-Continental<br>with hot or warm<br>summers | 2002           | ---- |
| US-Wi1 | 46.73 | -91.23 | DBF | Temperate-Continental<br>with hot or warm<br>summers | 2003           | ---- |

|        |       |        |     |                                                      |           |      |
|--------|-------|--------|-----|------------------------------------------------------|-----------|------|
| US-Wi2 | 46.69 | -91.15 | ENF | Temperate-Continental<br>with hot or warm<br>summers | 2003      | ---- |
| US-Wi4 | 46.74 | -91.17 | ENF | Temperate-Continental<br>with hot or warm<br>summers | 2002-2005 | ---- |
| US-Wi5 | 46.65 | -91.09 | ENF | Temperate-Continental<br>with hot or warm<br>summers | 2004      | ---- |
| US-Wi6 | 46.62 | -91.30 | OSH | Temperate-Continental<br>with hot or warm<br>summers | 2002      | ---- |
| US-Wi7 | 46.65 | -91.07 | OSH | Temperate-Continental<br>with hot or warm<br>summers | 2005      | ---- |
| US-Wi8 | 46.72 | -91.25 | DBF | Temperate-Continental<br>with hot or warm<br>summers | 2002      | ---- |
| US-Wi9 | 46.62 | -91.08 | ENF | Temperate-Continental<br>with hot or warm<br>summers | 2004-2005 | ---- |

57 <sup>1</sup> Positive value indicates north latitude.

58 <sup>2</sup> Negative value indicates west longitude.

59 Different plant functional types: CRO, croplands; CSH, closed shrublands; GRA, grasslands; MF, mixed forests; WET, permanent wetlands;

60 DBF, deciduous broadleaf forests; ENF, evergreen needleleaf forests; OSH, open shrublands.

61 **SUPPORTING REFERENCES**

- 62 1. Wohlfahrt, G. *et al.* Seasonal and inter-annual variability of the net ecosystem  
63 CO<sub>2</sub> exchange of a temperate mountain grassland: Effects of weather and  
64 management. *J. Geophys. Res-Atmos.* **113**, D08110 (2008).
- 65 2. Gielen, B. *et al.* A. Decadal water balance of a temperate Scots pine forest  
66 (*Pinus sylvestris* L.) based on measurements and modelling. *Biogeosciences* **7**,  
67 1247-1261 (2010).
- 68 3. Moureaux, C., Debacq, A., Bodson, B., Heinesch, B. & Aubinet, M. Annual  
69 net ecosystem carbon exchange by a sugar beet crop. *Agr. Forest Meteorol.*  
70 **139**, 25-39 (2006).
- 71 4. Aubinet, M. *et al.* Long term carbon dioxide exchange above a mixed forest in  
72 the Belgian Ardennes. *Agr. Forest Meteorol.* **108**, 293-315 (2001).
- 73 5. Dunn, A. L., Barford, C. C., Wofsy, S. C., Goulden, M. L. & Daube, B. C. A  
74 long-term record of carbon exchange in a boreal black spruce forest: means,  
75 responses to interannual variability, and decadal trends. *Glob. Chang. Biol.* **13**,  
76 577-590 (2007).
- 77 6. Lafleur, P. M., Roulet, N. T., Bubier, J. L., Frohking, S. & Moore, T. R.  
78 Interannual variability in the peatland-atmosphere carbon dioxide exchange at  
79 an ombrotrophic bog. *Global Biogeochem. Cy.* **17**, 1036 (2003).
- 80 7. Goulden, M. L., Miller, S. D. & da Rocha, H. R. Nocturnal cold air drainage  
81 and pooling in a tropical forest. *J. Geophys. Res-Atmos.* **111**, D08S04 (2006).
- 82 8. Giasson, M.-A., Coursolle, C. & Margolis, H. A. Ecosystem-level CO<sub>2</sub> fluxes  
83 from a boreal cutover in eastern Canada before and after scarification. *Agr.*  
84 *Forest Meteorol.* **140**, 23-40 (2006).
- 85 9. Bergeron, O. *et al.* Comparison of carbon dioxide fluxes over three boreal

- 86 black spruce forests in Canada. *Glob. Chang. Biol.* **13**, 89-107 (2007).
- 87 10. Zha, T. *et al.* Carbon sequestration in boreal jack pine stands following  
88 harvesting. *Glob. Chang. Biol.* **15**, 1475-1487 (2009).
- 89 11. Ammann, C., Flechard, C. R., Leifeld, J., Neftel, A. & Fuhrer, J. The carbon  
90 budget of newly established temperate grassland depends on management  
91 intensity. *Agr. Ecosyst. Environ.* **121**, 5-20 (2007).
- 92 12. Reichstein, M. *et al.* Modeling temporal and large-scale spatial variability of  
93 soil respiration from soil water availability, temperature and vegetation  
94 productivity indices. *Global Biogeochem. Cy.* **17**, 1104 (2003).
- 95 13. Valentini, R. *et al.* Respiration as the main determinant of carbon balance in  
96 European forests. *Nature* **404**, 861-865 (2000).
- 97 14. Anthoni, P. M. *et al.* Forest and agricultural land-use-dependent CO<sub>2</sub> exchange  
98 in Thuringia, Germany. *Glob. Chang. Biol.* **10**, 2005-2019 (2004).
- 99 15. Gilmanov, T. G., *et al.* Partitioning European grassland net ecosystem CO<sub>2</sub>  
100 exchange into gross primary productivity and ecosystem respiration using light  
101 response function analysis. *Agr. Ecosyst. Environ.* **121**, 93-120 (2007).
- 102 16. Knohl, A., Schulze, E.-D., Kolle, O. & Buchmann, N. Large carbon uptake by  
103 an unmanaged 250-year-old deciduous forest in Central Germany. *Agr. Forest  
104 Meteorol.* **118**, 151-167 (2003).
- 105 17. Chen, B. *et al.* A data-model fusion approach for upscaling gross ecosystem  
106 productivity to the landscape scale based on remote sensing and flux footprint  
107 modelling. *Biogeosciences* **7**, 2943-2958 (2010).
- 108 18. Don, A., Reibmann, C., Kolle, O., Scherer-Lorenzen, M. & Schulze, E.-D.  
109 Impact of afforestation-associated management changes on the carbon balance  
110 of grassland. *Glob. Chang. Biol.* **15**, 1990-2002 (2009).

- 111 19. Arain, M. A. & Restrepo-Coupe, N. Net ecosystem production in a temperate  
112 pine plantation in southeastern Canada. *Agr. Forest Meteorol.* **128**, 223-241  
113 (2005).
- 114 20. Rebmann, C. *et al.* Treatment and assessment of the CO<sub>2</sub>-exchange at a  
115 complex forest site in Thuringia, Germany. *Agr. Forest Meteorol.* **150**,  
116 684-691 (2010).
- 117 21. Pilegaard, K. *et al.* Field measurements of atmosphere-biosphere interactions  
118 in a Danish beech forest. *Boreal Environ. Res.* **8**, 315-334 (2003).
- 119 22. Migliavacca, M. *et al.* Semiempirical modeling of abiotic and biotic factors  
120 controlling ecosystem respiration across eddy covariance sites. *Glob. Chang.*  
121 *Biol.* **17**, 390-409 (2011).
- 122 23. Suni, T. *et al.* Long-term measurements of surface fluxes above a Scots pine  
123 forest in Hyytiala, southern Finland, 1996-2001. *Boreal Environ. Res.* **8**,  
124 287-302 (2003).
- 125 24. Granier, A. *et al.* The carbon balance of a young Beech forest. *Funct. Ecol.* **14**,  
126 312-325 (2000).
- 127 25. Berbigier, P., Bonnefond, J.-M. & Mellmann, P. CO<sub>2</sub> and water vapour fluxes  
128 for 2 years above Euroflux forest site. *Agr. Forest Meteorol.* **108**, 183-197  
129 (2001).
- 130 26. Pint r, K. *et al.* Interannual variability of grasslands' carbon balance depends  
131 on soil type. *Community Ecol.* **9**, 43-48 (2008).
- 132 27. Jaksic, V. *et al.* Net ecosystem exchange of grassland in contrasting wet and  
133 dry years. *Agr. Forest Meteorol.* **139**, 323-334 (2006).
- 134 28. Marcolla, B., Pitacco, A. & Cescatti, A. Canopy Architecture and Turbulence  
135 Structure in a Coniferous Forest. *Bound-Lay. Meteorol.* **108**, 39-59 (2003).



- 136 29. Migliavacca, M. *et al.* Modeling gross primary production of Agro-Forestry  
137 ecosystems by assimilation of satellite-derived information in a process-based  
138 model. *Sensors* **9**, 922-942 (2009).
- 139 30. Montagnani, L. *et al.* A new mass conservation approach to the study of CO<sub>2</sub>  
140 advection in an alpine forest. *J. Geophys. Res-Atmos.* **114**, D07306 (2009).
- 141 31. Jacobs, C. M. J. *et al.* Variability of annual CO<sub>2</sub> exchange from Dutch  
142 Grasslands. *Biogeosci. Discuss.*, European Geosciences Union **4**, 1499-1534  
143 (2007).
- 144 32. Dolman, A. J., Moors, E. J. & Elbers, J. A. The carbon uptake of a mid  
145 latitude pine forest growing on sandy soil. *Agr. Forest Meteorol.* **111**, 157-170  
146 (2002).
- 147 33. Chojnicki, B. H., Urbaniak, M., Józefczyk, D., Augustin, J. & Olejnik, J.  
148 Measurements of gas and heat fluxes at Rzecin wetland. *Wetlands: Monitoring,*  
149 *Modeling and Management (eds Okruszko T, Maltby E, Szatylowicz J,*  
150 *Mirosław-Swiątek D, Kotowski W)*, 125-131 (2007).
- 151 34. Kurbatova, J., Li, C., Varlagin, A., Xiao, X. & Vygodskaya, N. Modeling  
152 carbon dynamics in two adjacent spruce forests with different soil conditions  
153 in Russia. *Biogeosciences* **5**, 969-980 (2008).
- 154 35. Chevallier, F., Viovy, N., Reichstein, M. & Ciais, P. On the assignment of  
155 prior errors in Bayesian inversions of CO<sub>2</sub> surface fluxes. *Geophys. Res. Lett.*  
156 **33**, L13802 (2006).
- 157 36. Lund, M., Lindroth, A., Christensen, T. R. & StrÖM, L. Annual CO<sub>2</sub> balance  
158 of a temperate bog. *Tellus B* **59**, 804-811 (2007).
- 159 37. Lindroth, A., Klemedtsson, L., Grelle, A., Weslien, P. & Langvall, O.  
160 Measurement of net ecosystem exchange, productivity and respiration in three

- 161 spruce forests in Sweden shows unexpectedly large soil carbon losses.  
162 *Biogeochemistry* **89**, 43-60 (2008).
- 163 38. Lagergren, F. *et al.* Biophysical controls on CO<sub>2</sub> fluxes of three Northern  
164 forests based on long-term eddy covariance data. *Tellus B* **60**, 143-152 (2008).
- 165 39. Yi, C., *et al.* Climate control of terrestrial carbon exchange across biomes and  
166 continents. *Environ. Res. Lett.* **5**, 034007 (2010).
- 167 40. Groenendijk, M. *et al.* Assessing parameter variability in a photosynthesis  
168 model within and between plant functional types using global FLUXNET  
169 eddy covariance data. *Agr. Forest Meteorol.* **151**, 22-38 (2011).
- 170 41. Rebmann, C. *et al.* Quality analysis applied on eddy covariance measurements  
171 at complex forest sites using footprint modelling. *Theor. Appl. Climatol.* **80**,  
172 121-141 (2005).
- 173 42. Jenkins, J. P. *et al.* Refining light-use efficiency calculations for a deciduous  
174 forest canopy using simultaneous tower-based carbon flux and radiometric  
175 measurements. *Agr. Forest Meteorol.* **143**, 64-79 (2007).
- 176 43. Gilmanov, T. G. *et al.* Integration of CO<sub>2</sub> flux and remotely-sensed data for  
177 primary production and ecosystem respiration analyses in the Northern Great  
178 Plains: potential for quantitative spatial extrapolation. *Global Ecol. Biogeogr.*  
179 **14**, 271-292 (2005).
- 180 44. Urbanski, S. *et al.* Factors controlling CO<sub>2</sub> exchange on timescales from  
181 hourly to decadal at Harvard Forest. *J. Geophys. Res-Biogeosci.* **112**, G02020  
182 (2007).
- 183 45. Hollinger, D. Y. *et al.* Spatial and temporal variability in forest-atmosphere  
184 CO<sub>2</sub> exchange. *Glob. Chang. Biol.* **10**, 1689-1706 (2004).
- 185 46. Oren, R. A. M. *et al.* Estimating the uncertainty in annual net ecosystem

- 186 carbon exchange: spatial variation in turbulent fluxes and sampling errors in  
187 eddy-covariance measurements. *Glob. Chang. Biol.* **12**, 883-896 (2006).
- 188 47. Sulman, B. N., Desai, A. R., Cook, B. D., Saliendra, N. & Mackay, D. S.  
189 Contrasting carbon dioxide fluxes between a drying shrub wetland in Northern  
190 Wisconsin, USA, and nearby forests. *Biogeosciences* **6**, 1115-1126 (2009).
- 191 48. Richardson, A. D. *et al.* A multi-site analysis of random error in tower-based  
192 measurements of carbon and energy fluxes. *Agr. Forest Meteorol.* **136**, 1-18  
193 (2006).
- 194 49. DeForest, J. L. *et al.* Phenophases alter the soil respiration–temperature  
195 relationship in an oak-dominated forest. *Int. J. Biometeorol.* **51**, 135-144  
196 (2006).
- 197 50. Davis, K. J. *et al.* The annual cycles of CO<sub>2</sub> and H<sub>2</sub>O exchange over a northern  
198 mixed forest as observed from a very tall tower. *Glob. Chang. Biol.* **9**,  
199 1278-1293 (2003).
- 200 51. Desai, A. R., Bolstad, P. V., Cook, B. D., Davis, K. J. & Carey, E. V.  
201 Comparing net ecosystem exchange of carbon dioxide between an old-growth  
202 and mature forest in the upper Midwest, USA. *Agr. Forest Meteorol.* **128**,  
203 33-55 (2005).
- 204 52. Gough, C. M., Vogel, C. S., Schmid, H. P., Su, H. B. & Curtis, P. S.  
205 Multi-year convergence of biometric and meteorological estimates of forest  
206 carbon storage. *Agr. Forest Meteorol.* **148**, 158-170 (2008).
- 207 53. Cook, B. D. *et al.* Carbon exchange and venting anomalies in an upland  
208 deciduous forest in northern Wisconsin, USA. *Agr. Forest Meteorol.* **126**,  
209 271-295 (2004).

210
